# Supplementary material for: Microwave-assisted foaming and sintering to prepare lightweight high-strength polystyrene/carbon nanotube composite foams with an ultralow percolation threshold
Source: Royal Society of Chemistry journal article supplement (doi:10.1039/d1tc01923f), 2021-01-01
Supplement: d1tc01923f1.pdf [file d1tc01923f1.pdf]

## Supporting Information

### **Microwave-assisted foaming and sintering to prepare lightweight high-strength polystyrene/carbon nanotubes composite foams with an ultralow percolation threshold**

Yeping Xie<sup>a#</sup>, Zhao Li<sup>b#</sup>, Jiahong Tang<sup>a</sup>, Pan Li<sup>a</sup>, Wenhua Chen<sup>c, d</sup>, Pengju Liu<sup>a\*</sup>, Li Li<sup>a</sup>, Zhuo Zheng<sup>a</sup>

<sup>a</sup> *State Key Laboratory of Polymer Materials Engineering, Polymer Research Institute of Sichuan University, Chengdu 610065, China*

<sup>b</sup> *Department of Civil and Environmental Engineering, Villanova University, Villanova, Pennsylvania 19085, United States*

<sup>c</sup> *College of Architecture and Environment, Sichuan University, Chengdu, 610065, China*

<sup>d</sup> *National Engineering Research Centre for Flue Gas Desulfurization, Chengdu, 610065, China*

\*Email of corresponding author: [sculpj@163.com](mailto:sculpj@163.com) (Pengju Liu)

#Yeping Xie and Zhao Li contributed equally to this work

Closely resemble to the 3D filler network, a power-law equation was used here to anticipate the relationship between electrical conductivity and EG loading<sup>1</sup>.

$$\sigma = \sigma_0(\varphi - \varphi_c)^t \quad (\varphi > \varphi_c) \quad (1)$$

where  $\sigma$  represents the conductivity,  $\sigma_0$  is a constant reflects the intrinsic conductivity of CNTs,  $\varphi$  is the volume fraction of CNTs,  $\varphi_c$  is the percolation threshold, and  $t$  is a critical exponent revealing the dimensionality of the conductive networks. Find the logarithm of both sides of formula (1) with the natural logarithm as the base and fit in origin.

$$\ln\sigma = \ln\sigma_0 + t\ln(\varphi - \varphi_c) \quad (\varphi > \varphi_c) \quad (2)$$

The scattering parameters (S11 and S21) of samples were gathered to calculate the power coefficients absorption (A), reflection (R) and transmission (T) and EMI SE depending on the following equations:

$$R = |S_{11}|^2 \quad (3)$$

$$T = |S_{21}|^2 \quad (4)$$

$$A = 1 - R - T \quad (5)$$

$$SE_A = -10\log_{10}(T/(1 - R)) \quad (6)$$

$$SE_R = -10\log_{10}(1 - R) \quad (7)$$

$$EMI\ SE = SE_A + SE_R + SE_M \quad (8)$$

where the EMI SE is the summation of the reflection shielding ( $SE_R$ ), the absorption shielding ( $SE_A$ ) and the multiple reflections shielding ( $SE_M$ ), the  $SE_M$  can be neglected while the  $SE_{total} > 10$  dB.<sup>2</sup>

Generally,  $\delta$  represents the depth at which the intensity of the irradiation inside the materials decreases to 1/e of its original value at the surface, and it determines the  $SE_A$  with a fixed thickness ( $d$ ) of the material. The absorption effectiveness and skin depth (frequency dependence) according to the classical electromagnetic theory are reported by these following equations<sup>1</sup>:

$$SE_A = 20\frac{d}{\delta}\log e \quad (9)$$

Where the  $d$  is 2 mm and the  $e$  is natural logarithm.

$$\delta = \frac{1}{\sqrt{\pi f \mu_0 \mu_r \sigma_s}} \quad (10)$$

where  $f$  and  $\sigma_s$  represent the frequency and AC electrical conductivity, respectively.

$\mu_0$  equals to  $4\pi \times 10^{-7} \text{ H/m}$ ,  $\mu_r$  is the shield's relative magnetic permeability. For

nonmagnetic materials,  $\mu_r = 1$ .

**Table S1.** The optimal microwave parameters for coated EPS/CNTs beads

| Filler content (wt%) | microwave power (W) | irradiation time (s) |
|----------------------|---------------------|----------------------|
| 0.04                 | 800                 | 60                   |
| 0.06                 | 700                 | 60                   |
| 0.08                 | 600                 | 60                   |
| 0.1                  | 500                 | 60                   |
| 0.15                 | 400                 | 60                   |
| 0.2                  | 300                 | 60                   |
| 0.3                  | 300                 | 50                   |
| 0.4                  | 300                 | 40                   |
| 0.5                  | 300                 | 30                   |
| 0.75                 | 300                 | 25                   |
| 1                    | 300                 | 20                   |
| 1.5                  | 300                 | 12                   |
| 2.0                  | 300                 | 8                    |

## Reference

1. D. X. Yan, H. Pang, B. Li, R. Vajtai, L. Xu, P. G. Ren, J. H. Wang and Z. M. Li, *Adv. Funct. Mater.*, 2015, **25**, 559-566.
2. L. J. Xiaopeng Zhang, Gang Zhang, Dingxiang Yan, Zhongming Li, *Journal of Materials Chemistry C*, 2018, **6**, 10760-10766.
3. M. H. Al-Saleh, U. Sundararaj, *Carbon*, 2009, **47**, 1738-1746.
